# Supplementary material
Source: publisher figshare collection journal article supplement (https://acs.figshare.com/ndownloader/files/9852640)
Supplement: Supplementary file 1 [file 9852640]

 
data_test_0m_a 
 
_audit_creation_method            SHELXL-97 
_chemical_name_systematic 
; 
 ? 
; 
_chemical_name_common             ? 
_chemical_melting_point           ? 
_chemical_formula_moiety          ? 
_chemical_formula_sum 
 'C16 H17 N O2' 
_chemical_formula_weight          255.31 
 
loop_ 
 _atom_type_symbol 
 _atom_type_description 
 _atom_type_scat_dispersion_real 
 _atom_type_scat_dispersion_imag 
 _atom_type_scat_source 
 'C'  'C'   0.0033   0.0016 
 'International Tables Vol C Tables 4.2.6.8 and 6.1.1.4' 
 'H'  'H'   0.0000   0.0000 
 'International Tables Vol C Tables 4.2.6.8 and 6.1.1.4' 
 'N'  'N'   0.0061   0.0033 
 'International Tables Vol C Tables 4.2.6.8 and 6.1.1.4' 
 'O'  'O'   0.0106   0.0060 
 'International Tables Vol C Tables 4.2.6.8 and 6.1.1.4' 
 
_symmetry_cell_setting            Triclinic 
_symmetry_space_group_name_H-M    P-1 
 
loop_ 
 _symmetry_equiv_pos_as_xyz 
 'x, y, z' 
 '-x, -y, -z' 
 
_cell_length_a                    8.0644(9) 
_cell_length_b                    9.4449(11) 
_cell_length_c                    10.2338(12) 
_cell_angle_alpha                 107.7740(10) 
_cell_angle_beta                  104.803(2) 
_cell_angle_gamma                 106.592(2) 
_cell_volume                      659.32(13) 
_cell_formula_units_Z             2 
_cell_measurement_temperature     293(2) 
_cell_measurement_reflns_used     2680
_cell_measurement_theta_min       2.25 
_cell_measurement_theta_max       25.30
 
_exptl_crystal_description        block
_exptl_crystal_colour             colorless 
_exptl_crystal_size_max           0.24 
_exptl_crystal_size_mid           0.23 
_exptl_crystal_size_min           0.21 
_exptl_crystal_density_meas       ? 
_exptl_crystal_density_diffrn     1.286 
_exptl_crystal_density_method     'not measured' 
_exptl_crystal_F_000              272 
_exptl_absorpt_coefficient_mu     0.085 
_exptl_absorpt_correction_type    multi-scan 
_exptl_absorpt_correction_T_min   0.9800 
_exptl_absorpt_correction_T_max   0.9824 
_exptl_absorpt_process_details    ? 
 
_exptl_special_details 
; 
 ? 
; 
 
_diffrn_ambient_temperature       293(2) 
_diffrn_radiation_wavelength      0.71073 
_diffrn_radiation_type            MoK\a 
_diffrn_radiation_source          'fine-focus sealed tube' 
_diffrn_radiation_monochromator   graphite 
_diffrn_measurement_device_type   'CCD area detector' 
_diffrn_measurement_method        'phi and omega scans'  
_diffrn_detector_area_resol_mean  ? 
_diffrn_standards_number          ? 
_diffrn_standards_interval_count  ? 
_diffrn_standards_interval_time   ? 
_diffrn_standards_decay_%         ? 
_diffrn_reflns_number             6776 
_diffrn_reflns_av_R_equivalents   0.0294 
_diffrn_reflns_av_sigmaI/netI     0.0337 
_diffrn_reflns_limit_h_min        -9 
_diffrn_reflns_limit_h_max        9 
_diffrn_reflns_limit_k_min        -11 
_diffrn_reflns_limit_k_max        11 
_diffrn_reflns_limit_l_min        -12 
_diffrn_reflns_limit_l_max        12 
_diffrn_reflns_theta_min          2.25 
_diffrn_reflns_theta_max          25.45 
_reflns_number_total              2437 
_reflns_number_gt                 1811 
_reflns_threshold_expression      >2sigma(I) 
 
_computing_data_collection        ? 
_computing_cell_refinement        ? 
_computing_data_reduction         ? 
_computing_structure_solution     'SHELXS-97 (Sheldrick, 1990)' 
_computing_structure_refinement   'SHELXL-97 (Sheldrick, 1997)' 
_computing_molecular_graphics     ? 
_computing_publication_material   ? 
 
_refine_special_details 
; 
 Refinement of F^2^ against ALL reflections.  The weighted R-factor wR and 
 goodness of fit S are based on F^2^, conventional R-factors R are based 
 on F, with F set to zero for negative F^2^. The threshold expression of 
 F^2^ > 2sigma(F^2^) is used only for calculating R-factors(gt) etc. and is 
 not relevant to the choice of reflections for refinement.  R-factors based 
 on F^2^ are statistically about twice as large as those based on F, and R- 
 factors based on ALL data will be even larger. 
; 
 
_refine_ls_structure_factor_coef  Fsqd  
_refine_ls_matrix_type            full 
_refine_ls_weighting_scheme       calc  
_refine_ls_weighting_details 
 'calc w=1/[\s^2^(Fo^2^)+(0.0514P)^2^+0.1121P] where P=(Fo^2^+2Fc^2^)/3' 
_atom_sites_solution_primary      direct 
_atom_sites_solution_secondary    difmap 
_atom_sites_solution_hydrogens    geom 
_refine_ls_hydrogen_treatment     mixed 
_refine_ls_extinction_method      none 
_refine_ls_extinction_coef        ? 
_refine_ls_number_reflns          2437 
_refine_ls_number_parameters      175 
_refine_ls_number_restraints      0 
_refine_ls_R_factor_all           0.0643 
_refine_ls_R_factor_gt            0.0439 
_refine_ls_wR_factor_ref          0.1108 
_refine_ls_wR_factor_gt           0.1008 
_refine_ls_goodness_of_fit_ref    1.041 
_refine_ls_restrained_S_all       1.041 
_refine_ls_shift/su_max           0.000 
_refine_ls_shift/su_mean          0.000 
 
loop_ 
 _atom_site_label 
 _atom_site_type_symbol 
 _atom_site_fract_x 
 _atom_site_fract_y 
 _atom_site_fract_z 
 _atom_site_U_iso_or_equiv 
 _atom_site_adp_type 
 _atom_site_occupancy 
 _atom_site_symmetry_multiplicity 
 _atom_site_calc_flag 
 _atom_site_refinement_flags 
 _atom_site_disorder_assembly 
 _atom_site_disorder_group 
O2 O 0.93400(19) 0.20612(16) 0.69035(14) 0.0590(4) Uani 1 1 d . . . 
N1 N 0.71840(18) 0.49641(15) 0.45090(14) 0.0365(3) Uani 1 1 d . . . 
O1 O 0.6229(2) 0.67871(16) 0.39182(17) 0.0699(4) Uani 1 1 d . . . 
C14 C 0.7444(2) 0.35045(18) 0.42629(17) 0.0340(4) Uani 1 1 d . . . 
C9 C 0.8156(2) 0.34362(19) 0.55880(17) 0.0372(4) Uani 1 1 d . . . 
C8 C 0.8356(2) 0.4875(2) 0.67488(18) 0.0399(4) Uani 1 1 d . . . 
C3 C 0.7738(2) 0.58032(19) 0.60616(18) 0.0389(4) Uani 1 1 d . . . 
C10 C 0.8638(2) 0.2090(2) 0.57072(18) 0.0399(4) Uani 1 1 d . . . 
C13 C 0.6953(2) 0.21753(19) 0.27992(17) 0.0387(4) Uani 1 1 d . . . 
H13A H 0.7934 0.2455 0.2424 0.046 Uiso 1 1 calc R . . 
H13B H 0.5806 0.2065 0.2098 0.046 Uiso 1 1 calc R . . 
C12 C 0.6696(2) 0.05475(19) 0.29301(18) 0.0391(4) Uani 1 1 d . . . 
C2 C 0.6574(2) 0.5608(2) 0.3488(2) 0.0442(4) Uani 1 1 d . . . 
C11 C 0.8297(2) 0.0782(2) 0.42721(18) 0.0426(4) Uani 1 1 d . . . 
H11A H 0.8034 -0.0232 0.4387 0.051 Uiso 1 1 calc R . . 
H11B H 0.9434 0.1026 0.4071 0.051 Uiso 1 1 calc R . . 
C4 C 0.7764(3) 0.7293(2) 0.6891(2) 0.0512(5) Uani 1 1 d . . . 
H4 H 0.7359 0.7916 0.6438 0.061 Uiso 1 1 calc R . . 
C15 C 0.4824(2) -0.0163(2) 0.3066(2) 0.0529(5) Uani 1 1 d . . . 
H15A H 0.3831 -0.0321 0.2212 0.079 Uiso 1 1 calc R . . 
H15B H 0.4796 0.0568 0.3941 0.079 Uiso 1 1 calc R . . 
H15C H 0.4669 -0.1183 0.3129 0.079 Uiso 1 1 calc R . . 
C7 C 0.8985(3) 0.5420(2) 0.8283(2) 0.0551(5) Uani 1 1 d . . . 
H7 H 0.9380 0.4802 0.8745 0.066 Uiso 1 1 calc R . . 
C16 C 0.6738(3) -0.0622(2) 0.1534(2) 0.0624(6) Uani 1 1 d . . . 
H16A H 0.6586 -0.1640 0.1600 0.094 Uiso 1 1 calc R . . 
H16B H 0.7913 -0.0176 0.1447 0.094 Uiso 1 1 calc R . . 
H16C H 0.5743 -0.0782 0.0681 0.094 Uiso 1 1 calc R . . 
C1 C 0.6412(3) 0.4860(2) 0.1932(2) 0.0600(6) Uani 1 1 d . . . 
H1A H 0.5237 0.3949 0.1372 0.090 Uiso 1 1 calc R . . 
H1B H 0.7411 0.4504 0.1911 0.090 Uiso 1 1 calc R . . 
H1C H 0.6482 0.5641 0.1508 0.090 Uiso 1 1 calc R . . 
C5 C 0.8414(3) 0.7806(3) 0.8407(2) 0.0628(6) Uani 1 1 d . . . 
H5 H 0.8451 0.8798 0.8983 0.075 Uiso 1 1 calc R . . 
C6 C 0.9013(3) 0.6896(3) 0.9105(2) 0.0654(6) Uani 1 1 d . . . 
H6 H 0.9436 0.7280 1.0131 0.079 Uiso 1 1 calc R . . 
 
loop_ 
 _atom_site_aniso_label 
 _atom_site_aniso_U_11 
 _atom_site_aniso_U_22 
 _atom_site_aniso_U_33 
 _atom_site_aniso_U_23 
 _atom_site_aniso_U_13 
 _atom_site_aniso_U_12 
O2 0.0696(9) 0.0667(9) 0.0450(8) 0.0297(7) 0.0104(6) 0.0350(7) 
N1 0.0387(8) 0.0303(7) 0.0382(8) 0.0129(6) 0.0104(6) 0.0150(6) 
O1 0.0922(11) 0.0501(8) 0.0793(11) 0.0326(8) 0.0260(8) 0.0434(8) 
C14 0.0335(8) 0.0313(8) 0.0363(9) 0.0138(7) 0.0109(7) 0.0133(7) 
C9 0.0385(9) 0.0364(9) 0.0340(9) 0.0131(7) 0.0104(7) 0.0154(7) 
C8 0.0378(9) 0.0408(10) 0.0370(9) 0.0117(8) 0.0132(7) 0.0154(8) 
C3 0.0341(9) 0.0344(9) 0.0415(10) 0.0093(8) 0.0131(7) 0.0121(7) 
C10 0.0373(9) 0.0453(10) 0.0404(10) 0.0222(8) 0.0115(7) 0.0185(8) 
C13 0.0481(10) 0.0348(9) 0.0329(9) 0.0143(7) 0.0117(7) 0.0183(8) 
C12 0.0477(10) 0.0322(9) 0.0366(9) 0.0130(7) 0.0122(8) 0.0190(8) 
C2 0.0402(10) 0.0313(9) 0.0554(11) 0.0205(8) 0.0089(8) 0.0113(8) 
C11 0.0482(10) 0.0404(10) 0.0470(11) 0.0211(8) 0.0172(8) 0.0251(8) 
C4 0.0499(11) 0.0419(10) 0.0586(13) 0.0123(9) 0.0223(9) 0.0212(9) 
C15 0.0494(11) 0.0424(11) 0.0607(12) 0.0246(9) 0.0104(9) 0.0148(9) 
C7 0.0594(12) 0.0627(13) 0.0364(10) 0.0131(9) 0.0157(9) 0.0246(10) 
C16 0.0928(16) 0.0458(11) 0.0468(12) 0.0117(9) 0.0215(11) 0.0368(11) 
C1 0.0792(14) 0.0483(11) 0.0499(12) 0.0279(10) 0.0114(10) 0.0246(11) 
C5 0.0637(13) 0.0523(12) 0.0593(14) 0.0019(11) 0.0277(11) 0.0233(11) 
C6 0.0689(14) 0.0711(15) 0.0401(11) 0.0044(11) 0.0208(10) 0.0251(12) 
 
_geom_special_details 
; 
 All esds (except the esd in the dihedral angle between two l.s. planes) 
 are estimated using the full covariance matrix.  The cell esds are taken 
 into account individually in the estimation of esds in distances, angles 
 and torsion angles; correlations between esds in cell parameters are only 
 used when they are defined by crystal symmetry.  An approximate (isotropic) 
 treatment of cell esds is used for estimating esds involving l.s. planes. 
; 
 
loop_ 
 _geom_bond_atom_site_label_1 
 _geom_bond_atom_site_label_2 
 _geom_bond_distance 
 _geom_bond_site_symmetry_2 
 _geom_bond_publ_flag 
O2 C10 1.2224(19) . ? 
N1 C14 1.4102(19) . ? 
N1 C2 1.414(2) . ? 
N1 C3 1.421(2) . ? 
O1 C2 1.205(2) . ? 
C14 C9 1.360(2) . ? 
C14 C13 1.497(2) . ? 
C9 C8 1.441(2) . ? 
C9 C10 1.462(2) . ? 
C8 C7 1.392(2) . ? 
C8 C3 1.399(2) . ? 
C3 C4 1.395(2) . ? 
C10 C11 1.500(2) . ? 
C13 C12 1.544(2) . ? 
C13 H13A 0.9700 . ? 
C13 H13B 0.9700 . ? 
C12 C15 1.528(2) . ? 
C12 C16 1.531(2) . ? 
C12 C11 1.532(2) . ? 
C2 C1 1.485(3) . ? 
C11 H11A 0.9700 . ? 
C11 H11B 0.9700 . ? 
C4 C5 1.378(3) . ? 
C4 H4 0.9300 . ? 
C15 H15A 0.9600 . ? 
C15 H15B 0.9600 . ? 
C15 H15C 0.9600 . ? 
C7 C6 1.381(3) . ? 
C7 H7 0.9300 . ? 
C16 H16A 0.9600 . ? 
C16 H16B 0.9600 . ? 
C16 H16C 0.9600 . ? 
C1 H1A 0.9600 . ? 
C1 H1B 0.9600 . ? 
C1 H1C 0.9600 . ? 
C5 C6 1.384(3) . ? 
C5 H5 0.9300 . ? 
C6 H6 0.9300 . ? 
 
loop_ 
 _geom_angle_atom_site_label_1 
 _geom_angle_atom_site_label_2 
 _geom_angle_atom_site_label_3 
 _geom_angle 
 _geom_angle_site_symmetry_1 
 _geom_angle_site_symmetry_3 
 _geom_angle_publ_flag 
C14 N1 C2 129.82(14) . . ? 
C14 N1 C3 107.35(12) . . ? 
C2 N1 C3 122.78(13) . . ? 
C9 C14 N1 109.10(14) . . ? 
C9 C14 C13 123.80(14) . . ? 
N1 C14 C13 127.04(14) . . ? 
C14 C9 C8 108.65(14) . . ? 
C14 C9 C10 122.30(15) . . ? 
C8 C9 C10 129.03(15) . . ? 
C7 C8 C3 120.15(16) . . ? 
C7 C8 C9 133.05(17) . . ? 
C3 C8 C9 106.80(14) . . ? 
C4 C3 C8 121.10(16) . . ? 
C4 C3 N1 130.81(16) . . ? 
C8 C3 N1 108.09(13) . . ? 
O2 C10 C9 122.07(16) . . ? 
O2 C10 C11 122.12(15) . . ? 
C9 C10 C11 115.75(14) . . ? 
C14 C13 C12 111.48(13) . . ? 
C14 C13 H13A 109.3 . . ? 
C12 C13 H13A 109.3 . . ? 
C14 C13 H13B 109.3 . . ? 
C12 C13 H13B 109.3 . . ? 
H13A C13 H13B 108.0 . . ? 
C15 C12 C16 109.38(15) . . ? 
C15 C12 C11 110.18(14) . . ? 
C16 C12 C11 108.35(14) . . ? 
C15 C12 C13 110.13(14) . . ? 
C16 C12 C13 108.44(14) . . ? 
C11 C12 C13 110.31(13) . . ? 
O1 C2 N1 118.51(17) . . ? 
O1 C2 C1 121.25(17) . . ? 
N1 C2 C1 120.22(15) . . ? 
C10 C11 C12 115.10(13) . . ? 
C10 C11 H11A 108.5 . . ? 
C12 C11 H11A 108.5 . . ? 
C10 C11 H11B 108.5 . . ? 
C12 C11 H11B 108.5 . . ? 
H11A C11 H11B 107.5 . . ? 
C5 C4 C3 117.28(18) . . ? 
C5 C4 H4 121.4 . . ? 
C3 C4 H4 121.4 . . ? 
C12 C15 H15A 109.5 . . ? 
C12 C15 H15B 109.5 . . ? 
H15A C15 H15B 109.5 . . ? 
C12 C15 H15C 109.5 . . ? 
H15A C15 H15C 109.5 . . ? 
H15B C15 H15C 109.5 . . ? 
C6 C7 C8 118.81(19) . . ? 
C6 C7 H7 120.6 . . ? 
C8 C7 H7 120.6 . . ? 
C12 C16 H16A 109.5 . . ? 
C12 C16 H16B 109.5 . . ? 
H16A C16 H16B 109.5 . . ? 
C12 C16 H16C 109.5 . . ? 
H16A C16 H16C 109.5 . . ? 
H16B C16 H16C 109.5 . . ? 
C2 C1 H1A 109.5 . . ? 
C2 C1 H1B 109.5 . . ? 
H1A C1 H1B 109.5 . . ? 
C2 C1 H1C 109.5 . . ? 
H1A C1 H1C 109.5 . . ? 
H1B C1 H1C 109.5 . . ? 
C4 C5 C6 122.39(19) . . ? 
C4 C5 H5 118.8 . . ? 
C6 C5 H5 118.8 . . ? 
C7 C6 C5 120.25(19) . . ? 
C7 C6 H6 119.9 . . ? 
C5 C6 H6 119.9 . . ? 
 
_diffrn_measured_fraction_theta_max    0.997 
_diffrn_reflns_theta_full              25.45 
_diffrn_measured_fraction_theta_full   0.997 
_refine_diff_density_max    0.125 
_refine_diff_density_min   -0.208 
_refine_diff_density_rms    0.043 
